# Supplementary material for: Arbuscular Mycorrhizal Fungus Alters Root System Architecture in Camellia sinensis L. as Revealed by RNA-Seq Analysis
Source: Front Plant Sci. 2021 Nov 12;12:777357. doi: 10.3389/fpls.2021.777357 (PMC8636117; doi:10.3389/fpls.2021.777357)
Supplement: Supplementary file 4 [file Data_Sheet_4.xlsx]

## Sheet: (A) sugar and P
Supplementary data 4 Correlation coefficients between RSA indexes and other indexes. (A) RSA indexes and contents of sugar and P; (B) RSA indexes and DEGs of Phosphorus metabolism; (C) RSA indexes and DEGs of Sugar metabolism; (D) RSA indexes and DEGs of Plant hormone; (E) RSA indexes and DEGs of Lipid metabolism. AR: adventitious root number; LR: lateral root number; TLR: total lateral root numb…
Root indexes	Sucrose	Reducing sugar	Soluble sugar	Phosphorus in shoot
AR	0.709	0.68	0.301	-0.787
1st LR	-0.329	-0.178	-0.544	0.469
2nd LR	-.957**	-0.659	-0.661	.941**
3rd LR	0.541	0.66	0.383	-0.656
4th LR	0.8	0.683	0.715	-.892*
TLR	-.818*	-0.488	-0.658	.820*
1st LR / AR	-0.763	-0.666	-0.553	.919**
2nd LR / 1st LR	-.982**	-0.734	-0.582	.926**
3rd LR / 2nd LR	0.811	0.772	0.624	-.919**
4th LR / 3rd LR	.860*	0.673	0.723	-.876*
1st LR / TRL	0.423	0.294	-0.045	-0.207
2nd LR / TRL	-.877*	-0.609	-0.635	.961**
3rd LR / TRL	.896*	0.791	0.602	-.942**
4th LR / TRL	.845*	0.705	0.709	-.921**
TLR / TRL	-0.186	-0.053	-0.405	0.371
TRL	-.813*	-0.549	-0.461	0.638
TPA	-0.705	-0.491	-0.589	0.509
TSA	-0.705	-0.491	-0.589	0.509
TV	-0.65	-0.566	-0.639	0.439
AD	-0.729	-0.271	-0.505	0.654
D1L	-.833*	-0.491	-0.217	0.714
D2L	-0.252	-0.276	-0.623	0.082
D3L	-0.197	-0.627	-0.186	0.195
D4L	-0.513	0.301	0.283	0.537

## Sheet: (B) DEGs of P
Supplementary data 4 Correlation coefficients between RSA indexes and other indexes. (A) RSA indexes and contents of sugar and P; (B) RSA indexes and DEGs of Phosphorus metabolism; (C) RSA indexes and DEGs of Sugar metabolism; (D) RSA indexes and DEGs of Plant hormone; (E) RSA indexes and DEGs of Lipid metabolism. AR: adventitious root number; LR: lateral root number; TLR: total lateral root numb…
Gene ID	AR	1st LR	2nd LR	3rd LR	4th LR	TLR	1st LR / AR	2nd LR / 1st LR	3rd LR / 2nd LR	4th LR / 3rd LR	1st LR / TRL	2nd LR / TRL	3rd LR / TRL	4th LR / TRL	TLR / TRL	TRL	TPA	TSA	TV	AD	D1L	D2L	D3L	D4L
114316147	-0.563	-0.016	0.62	-0.678	-0.641	0.397	0.439	0.767	-0.699	-0.732	-0.456	0.528	-0.785	-0.737	-0.11	0.6	0.543	0.543	0.617	0.272	0.566	0.259	0.506	-0.134
114279494	-0.51	0.118	0.707	-0.546	-0.657	0.54	0.472	0.8	-0.671	-0.752	-0.436	0.581	-0.756	-0.754	-0.027	0.701	0.695	0.695	0.761	0.435	0.582	0.461	0.433	-0.15
114314672	-0.441	0.083	0.644	-0.55	-0.632	0.475	0.391	0.746	-0.633	-0.741	-0.409	0.528	-0.719	-0.732	-0.04	0.64	0.649	0.649	0.722	0.382	0.52	0.443	0.393	-0.167
114258211	-0.506	0.049	0.581	-0.697	-0.669	0.379	0.429	0.706	-0.704	-0.747	-0.337	0.524	-0.765	-0.743	-0.026	0.508	0.482	0.482	0.564	0.237	0.452	0.268	0.464	-0.197
114318142	-0.491	-0.296	0.389	-0.695	-0.454	0.111	0.215	0.613	-0.553	-0.571	-0.52	0.322	-0.664	-0.572	-0.303	0.422	0.294	0.294	0.357	0.039	0.523	-0.06	0.454	0.032
114298463	-0.439	0.117	0.676	-0.592	-0.687	0.505	0.405	0.773	-0.67	-0.806	-0.379	0.584	-0.758	-0.792	0.016	0.625	0.626	0.626	0.678	0.423	0.535	0.386	0.298	-0.013
114300100	-0.561	0.144	.815*	-0.563	-0.717	0.638	0.523	.903*	-0.714	-.839*	-0.483	0.713	-.828*	-.845*	0.033	0.752	0.677	0.677	0.663	0.591	0.75	0.271	0.197	0.383
114321363	-0.441	-0.039	0.645	-0.532	-0.578	0.444	0.314	0.783	-0.584	-0.731	-0.535	0.518	-0.714	-0.723	-0.13	0.676	0.622	0.622	0.647	0.424	0.657	0.274	0.253	0.196
114321088	-0.645	-0.062	0.62	-0.681	-0.607	0.382	0.487	0.781	-0.708	-0.678	-0.514	0.514	-0.793	-0.698	-0.172	0.629	0.54	0.54	0.622	0.236	0.613	0.229	0.625	-0.195
114309833	-0.431	0.306	.837*	-0.369	-0.689	0.745	0.511	.853*	-0.631	-0.799	-0.402	0.683	-0.723	-0.796	0.116	.820*	.861*	.861*	.883*	0.693	0.638	0.638	0.216	0.044
114269279	-0.628	-0.12	0.593	-0.754	-0.625	0.327	0.433	0.778	-0.717	-0.72	-0.511	0.526	-.817*	-0.733	-0.171	0.56	0.433	0.433	0.481	0.215	0.633	0.042	0.485	0.076
114296850	-0.452	0.334	.898*	-0.321	-0.688	.817*	0.542	.895*	-0.616	-0.811	-0.42	0.771	-0.728	-.815*	0.178	.834*	0.808	0.808	0.746	.827*	0.767	0.438	-0.031	0.557
114308503	-0.437	0.17	0.803	-0.226	-0.53	0.704	0.441	.844*	-0.508	-0.654	-0.572	0.578	-0.632	-0.664	-0.058	.919**	.933**	.933**	.956**	0.692	0.738	0.668	0.291	0.023
114266246	-0.534	0.312	.885*	-0.509	-0.779	0.759	0.598	.910*	-0.733	-.884*	-0.37	0.81	-.828*	-.889*	0.199	0.746	0.692	0.692	0.642	0.718	0.732	0.301	0.045	0.531
114320703	-0.406	0.204	0.678	-0.471	-0.647	0.556	0.435	0.732	-0.621	-0.737	-0.334	0.559	-0.688	-0.729	0.054	0.655	0.703	0.703	0.775	0.455	0.477	0.561	0.359	-0.228
114297788	-0.495	-0.009	0.57	-0.653	-0.617	0.361	0.386	0.709	-0.66	-0.709	-0.406	0.483	-0.737	-0.706	-0.097	0.55	0.521	0.521	0.606	0.238	0.488	0.294	0.485	-0.211
114308613	-0.556	0.39	.952**	-0.426	-0.779	.857*	0.665	.945**	-0.728	-.871*	-0.381	.852*	-.819*	-.884*	0.235	.827*	0.785	0.785	0.728	.814*	0.775	0.402	0.053	0.515
114269428	-0.452	0.278	.833*	-0.443	-0.721	0.718	0.51	.866*	-0.669	-.837*	-0.401	0.698	-0.763	-.832*	0.112	0.791	.815*	.815*	.835*	0.661	0.643	0.564	0.211	0.097
114289395	-0.395	-0.076	0.538	-0.576	-0.551	0.331	0.257	0.689	-0.567	-0.689	-0.465	0.427	-0.675	-0.674	-0.153	0.569	0.545	0.545	0.615	0.274	0.514	0.294	0.357	-0.069
114312586	-0.626	-0.022	0.668	-0.736	-0.683	0.425	0.485	.820*	-0.744	-0.782	-0.469	0.62	-.845*	-0.793	-0.066	0.579	0.446	0.446	0.455	0.333	0.675	0.014	0.335	0.305
114298048	0.494	-0.207	-0.779	0.607	0.763	-0.617	-0.501	-.848*	0.73	.880*	0.356	-0.721	.822*	.874*	-0.129	-0.647	-0.603	-0.603	-0.59	-0.559	-0.637	-0.253	-0.117	-0.375
114258025	0.238	-0.229	-0.752	0.209	0.557	-0.684	-0.295	-0.766	0.444	0.729	0.425	-0.595	0.576	0.707	-0.086	-0.772	-0.805	-0.805	-0.766	-0.756	-0.65	-0.524	0.119	-0.455
114262522	0.281	-0.075	-0.583	0.498	0.601	-0.432	-0.244	-0.677	0.546	0.751	0.355	-0.484	0.645	0.72	0.006	-0.566	-0.601	-0.601	-0.649	-0.403	-0.457	-0.408	-0.166	-0.021
114261688	0.276	-0.147	-0.599	0.538	0.658	-0.459	-0.279	-0.671	0.581	0.802	0.261	-0.556	0.669	0.768	-0.109	-0.489	-0.503	-0.503	-0.509	-0.44	-0.444	-0.267	-0.001	-0.28
114309241	0.229	0.14	-0.458	0.408	0.416	-0.279	-0.075	-0.603	0.389	0.599	0.491	-0.332	0.528	0.571	0.193	-0.542	-0.521	-0.521	-0.55	-0.322	-0.515	-0.246	-0.114	-0.196
114304683	0.669	-0.1	-0.789	0.638	0.708	-0.585	-0.593	-.892*	0.753	0.797	0.474	-0.732	.857*	.821*	-0.029	-0.675	-0.523	-0.523	-0.48	-0.518	-0.786	-0.027	-0.212	-0.555
114280618	-0.004	-0.445	-0.617	0.239	0.635	-0.627	-0.214	-0.553	0.424	0.783	0.022	-0.584	0.485	0.726	-0.385	-0.452	-0.587	-0.587	-0.547	-0.678	-0.285	-0.507	0.39	-0.42
114277706	0.437	-0.206	-0.733	0.574	0.735	-0.584	-0.454	-0.801	0.696	.849*	0.339	-0.647	0.778	.835*	-0.096	-0.65	-0.665	-0.665	-0.703	-0.503	-0.543	-0.43	-0.239	-0.043
114306546	0.572	-0.458	-0.743	0.794	.932**	-0.619	-0.726	-0.744	.910*	.932**	-0.011	-.814*	.892*	.932**	-0.413	-0.395	-0.388	-0.388	-0.41	-0.403	-0.355	-0.206	-0.251	-0.042
114313572	0.445	-0.396	-0.802	0.627	.865*	-0.689	-0.571	-.812*	0.788	.950**	0.164	-0.784	.835*	.934**	-0.313	-0.578	-0.602	-0.602	-0.606	-0.583	-0.489	-0.377	-0.091	-0.211
114283038	0.418	-0.205	-0.669	0.674	0.77	-0.508	-0.436	-0.742	0.726	.875*	0.232	-0.649	0.79	.854*	-0.158	-0.501	-0.498	-0.498	-0.523	-0.415	-0.459	-0.257	-0.157	-0.155
114312300	0.296	0.078	-0.628	0.217	0.383	-0.484	-0.169	-0.74	0.355	0.576	0.658	-0.412	0.527	0.567	0.224	-0.805	-0.776	-0.776	-0.774	-0.568	-0.733	-0.429	-0.112	-0.306
114319002	0.49	-0.043	-0.751	0.429	0.578	-0.581	-0.404	-.850*	0.575	0.724	0.568	-0.615	0.717	0.731	0.068	-0.769	-0.678	-0.678	-0.644	-0.597	-0.79	-0.238	-0.121	-0.502
114301217	0.665	-0.219	-0.808	0.758	.840*	-0.613	-0.659	-.889*	.861*	.907*	0.326	-0.798	.928**	.920**	-0.161	-0.601	-0.496	-0.496	-0.48	-0.486	-0.664	-0.089	-0.244	-0.384
114317171	.930**	-0.15	-.862*	0.654	0.71	-0.654	-.861*	-.948**	.851*	0.702	0.506	-0.801	.919**	0.773	-0.023	-0.739	-0.521	-0.521	-0.486	-0.489	-.875*	0.013	-0.509	-0.381
114297081	0.719	0.024	-0.794	0.599	0.636	-0.56	-0.566	-.939**	0.723	0.737	0.654	-0.653	.852*	0.769	0.157	-.817*	-0.67	-0.67	-0.677	-0.485	-.865*	-0.186	-0.449	-0.265
114261192	0.544	-0.106	-0.811	0.503	0.668	-0.636	-0.486	-.905*	0.667	0.801	0.544	-0.676	0.794	0.808	0.025	-0.802	-0.733	-0.733	-0.724	-0.607	-0.78	-0.328	-0.219	-0.345
114280247	0.479	-0.446	-.870*	0.591	.883*	-0.77	-0.629	-.862*	0.803	.966**	0.184	-.844*	.855*	.957**	-0.347	-0.638	-0.65	-0.65	-0.63	-0.675	-0.559	-0.384	-0.046	-0.33
114287515	0.201	-0.183	-0.663	0.33	0.585	-0.569	-0.235	-0.703	0.473	0.759	0.35	-0.547	0.59	0.724	-0.086	-0.644	-0.69	-0.69	-0.68	-0.614	-0.531	-0.458	0.088	-0.338
114284283	0.797	0.064	-0.785	0.583	0.586	-0.543	-0.614	-.936**	0.711	0.666	0.69	-0.655	.841*	0.715	0.187	-0.806	-0.598	-0.598	-0.576	-0.469	-.931**	-0.035	-0.455	-0.418
114263278	0.26	-0.572	-0.746	0.539	.878*	-0.711	-0.516	-0.681	0.722	.954**	-0.076	-0.786	0.732	.916*	-0.521	-0.425	-0.519	-0.519	-0.499	-0.625	-0.296	-0.411	0.162	-0.287
114301937	.827*	0.192	-0.708	0.434	0.398	-0.467	-0.574	-.877*	0.578	0.459	.812*	-0.528	0.721	0.531	0.347	-.845*	-0.597	-0.597	-0.576	-0.411	-.988**	-0.008	-0.57	-0.354

## Sheet: (C) DEGs of Sugar metabolism
Supplementary data 4 Correlation coefficients between RSA indexes and other indexes. (A) RSA indexes and contents of sugar and P; (B) RSA indexes and DEGs of Phosphorus metabolism; (C) RSA indexes and DEGs of Sugar metabolism; (D) RSA indexes and DEGs of Plant hormone; (E) RSA indexes and DEGs of Lipid metabolism. AR: adventitious root number; LR: lateral root number; TLR: total lateral root numb…
Gene ID	AR	1st LR	2nd LR	3rd LR	4th LR	TLR	1st LR / AR	2nd LR / 1st LR	3rd LR / 2nd LR	4th LR / 3rd LR	1st LR / TRL	2nd LR / TRL	3rd LR / TRL	4th LR / TRL	TLR / TRL	TRL	TPA	TSA	TV	AD	D1L	D2L	D3L	D4L
114263353	-0.516	-0.218	0.355	-0.79	-0.519	0.084	0.287	0.562	-0.627	-0.591	-0.376	0.337	-0.693	-0.592	-0.212	0.311	0.207	0.207	0.3	-0.06	0.387	-0.059	0.551	-0.186
114280123	-0.511	-0.213	0.355	-0.784	-0.518	0.086	0.286	0.56	-0.624	-0.589	-0.373	0.334	-0.689	-0.59	-0.211	0.314	0.216	0.216	0.311	-0.059	0.38	-0.041	0.558	-0.21
114258811	-0.531	-0.184	0.424	-0.778	-0.555	0.157	0.317	0.624	-0.65	-0.639	-0.409	0.391	-0.727	-0.64	-0.193	0.383	0.28	0.28	0.361	0.026	0.45	-0.015	0.515	-0.111
114284227	-0.55	-0.115	0.49	-0.775	-0.601	0.235	0.37	0.664	-0.675	-0.69	-0.374	0.498	-0.758	-0.694	-0.088	0.37	0.22	0.22	0.231	0.143	0.53	-0.183	0.29	0.319
114283870	-0.526	-0.228	0.368	-0.772	-0.508	0.095	0.29	0.578	-0.621	-0.583	-0.41	0.333	-0.692	-0.586	-0.237	0.347	0.244	0.244	0.34	-0.046	0.412	-0.026	0.579	-0.213
114296000	-0.324	0.292	0.728	-0.226	-0.549	0.676	0.411	0.71	-0.464	-0.663	-0.304	0.661	-0.565	-0.663	0.21	0.625	0.57	0.57	0.458	0.737	0.655	0.189	-0.262	.836*
114307269	-0.522	-0.112	0.508	-0.663	-0.551	0.274	0.352	0.678	-0.63	-0.638	-0.461	0.413	-0.712	-0.642	-0.193	0.528	0.472	0.472	0.569	0.147	0.495	0.227	0.572	-0.267
114293834	-0.502	-0.184	0.419	-0.685	-0.5	0.171	0.295	0.609	-0.595	-0.582	-0.446	0.34	-0.673	-0.585	-0.24	0.445	0.377	0.377	0.484	0.038	0.438	0.144	0.601	-0.312
114278656	-0.373	0.397	.859*	-0.368	-0.738	0.792	0.508	.838*	-0.63	-.862*	-0.287	0.779	-0.722	-.850*	0.278	0.722	0.728	0.728	0.665	0.797	0.649	0.413	-0.133	0.572
114261420	-0.531	-0.11	0.481	-0.793	-0.617	0.226	0.356	0.658	-0.686	-0.708	-0.363	0.48	-0.763	-0.706	-0.096	0.373	0.255	0.255	0.294	0.116	0.485	-0.094	0.356	0.151
114287094	-0.471	-0.344	0.232	-0.769	-0.409	-0.056	0.177	0.469	-0.537	-0.486	-0.397	0.221	-0.61	-0.487	-0.305	0.223	0.093	0.093	0.184	-0.178	0.348	-0.187	0.541	-0.154
114298817	-0.465	0.28	.845*	-0.483	-0.75	0.722	0.52	.882*	-0.695	-.871*	-0.391	0.729	-0.792	-.864*	0.135	0.774	0.781	0.781	0.785	0.67	0.66	0.493	0.159	0.213
114289958	-0.477	0.292	.862*	-0.49	-0.764	0.738	0.537	.895*	-0.706	-.885*	-0.386	0.758	-0.805	-.880*	0.159	0.768	0.758	0.758	0.743	0.695	0.686	0.435	0.104	0.334
114314873	-0.509	-0.278	0.339	-0.772	-0.48	0.057	0.245	0.563	-0.593	-0.567	-0.429	0.313	-0.675	-0.569	-0.263	0.322	0.197	0.197	0.277	-0.06	0.429	-0.113	0.516	-0.085
114296460	-0.38	0.421	.906*	-0.205	-0.661	.872*	0.533	.859*	-0.557	-0.779	-0.363	0.772	-0.66	-0.781	0.247	.839*	.846*	.846*	0.771	.902*	0.731	0.522	-0.125	0.58
114285673	-0.486	-0.273	0.385	-0.714	-0.473	0.11	0.225	0.604	-0.569	-0.584	-0.486	0.327	-0.671	-0.582	-0.279	0.402	0.286	0.286	0.357	0.024	0.489	-0.042	0.469	-0.024
114286559	-0.519	0.061	0.737	-0.581	-0.672	0.542	0.439	.852*	-0.678	-0.803	-0.5	0.623	-0.794	-0.802	-0.046	0.715	0.659	0.659	0.68	0.489	0.687	0.302	0.28	0.2
114301134	-0.352	0.196	0.721	-0.467	-0.676	0.594	0.375	0.78	-0.611	-.814*	-0.37	0.603	-0.708	-0.793	0.071	0.688	0.727	0.727	0.76	0.555	0.548	0.511	0.165	0.068
114318002	-0.457	-0.198	0.45	-0.621	-0.48	0.208	0.244	0.642	-0.554	-0.596	-0.51	0.34	-0.657	-0.592	-0.267	0.518	0.459	0.459	0.554	0.12	0.497	0.202	0.524	-0.218
114283525	-0.456	-0.07	0.61	-0.572	-0.573	0.396	0.31	0.762	-0.596	-0.716	-0.528	0.488	-0.718	-0.709	-0.159	0.645	0.593	0.593	0.639	0.352	0.619	0.27	0.335	0.073
114281749	-0.231	0.489	.864*	-0.077	-0.614	.883*	0.445	0.778	-0.459	-0.743	-0.284	0.72	-0.555	-0.73	0.304	0.81	.883*	.883*	0.81	.942**	0.63	0.656	-0.236	0.517
114273321	-0.189	0.491	0.713	-0.134	-0.577	0.741	0.414	0.613	-0.424	-0.67	-0.085	0.692	-0.486	-0.657	0.42	0.519	0.529	0.529	0.398	0.806	0.497	0.26	-0.458	.871*
114301062	-0.465	0.05	0.551	-0.695	-0.661	0.354	0.394	0.673	-0.686	-0.743	-0.303	0.503	-0.743	-0.733	-0.013	0.469	0.455	0.455	0.538	0.216	0.409	0.262	0.431	-0.202
114311059	-0.469	-0.17	0.423	-0.718	-0.535	0.173	0.271	0.613	-0.608	-0.634	-0.413	0.369	-0.691	-0.628	-0.196	0.41	0.339	0.339	0.426	0.061	0.433	0.081	0.486	-0.158
114300723	-0.297	0.367	.848*	-0.106	-0.569	.828*	0.43	0.804	-0.453	-0.706	-0.395	0.691	-0.571	-0.702	0.191	.837*	.855*	.855*	0.777	.898*	0.719	0.545	-0.18	0.598
114282487	0.376	-0.472	-0.715	0.687	.898*	-0.624	-0.558	-0.698	0.797	.958**	-0.041	-0.786	0.805	.932**	-0.457	-0.37	-0.401	-0.401	-0.386	-0.502	-0.327	-0.222	0.051	-0.309
114300260	0.411	-0.355	-0.725	0.674	.849*	-0.601	-0.518	-0.75	0.776	.934**	0.116	-0.735	.815*	.911*	-0.305	-0.481	-0.504	-0.504	-0.516	-0.489	-0.414	-0.301	-0.084	-0.185
114272332	0.802	-0.266	-.911*	0.654	0.805	-0.734	-0.809	-.964**	.864*	.838*	0.41	-.873*	.936**	.881*	-0.161	-0.725	-0.561	-0.561	-0.504	-0.609	-.828*	-0.058	-0.274	-0.546
114270351	0.413	0.005	-0.627	0.548	0.596	-0.436	-0.309	-0.752	0.586	0.746	0.462	-0.538	0.707	0.733	0.064	-0.604	-0.544	-0.544	-0.547	-0.424	-0.62	-0.187	-0.146	-0.331
114279634	0.246	0.018	-0.56	0.398	0.5	-0.406	-0.158	-0.672	0.449	0.679	0.465	-0.421	0.58	0.649	0.108	-0.622	-0.637	-0.637	-0.67	-0.432	-0.532	-0.394	-0.119	-0.134
114319435	-0.105	0.123	-0.332	-0.005	0.165	-0.262	0.199	-0.416	0.052	0.392	0.475	-0.126	0.21	0.341	0.225	-0.56	-0.649	-0.649	-0.674	-0.421	-0.395	-0.529	0.112	-0.126
114273482	0.478	-0.099	-0.718	0.527	0.645	-0.549	-0.426	-0.806	0.63	0.774	0.433	-0.649	0.745	0.774	-0.037	-0.636	-0.545	-0.545	-0.503	-0.539	-0.694	-0.123	-0.053	-0.562
114269900	0.683	-0.284	-.853*	0.75	.875*	-0.672	-0.713	-.914*	.890*	.932**	0.303	-.842*	.949**	.948**	-0.21	-0.628	-0.533	-0.533	-0.515	-0.534	-0.671	-0.137	-0.246	-0.369
114300263	0.012	-0.363	-0.579	0.299	0.625	-0.557	-0.179	-0.55	0.437	0.78	0.066	-0.533	0.502	0.72	-0.302	-0.448	-0.586	-0.586	-0.58	-0.588	-0.267	-0.525	0.266	-0.249
114314486	0.677	0.014	-0.794	0.504	0.585	-0.584	-0.536	-.922**	0.655	0.697	0.661	-0.652	0.796	0.73	0.14	-.823*	-0.662	-0.662	-0.631	-0.554	-.902*	-0.137	-0.308	-0.479
114269467	0.583	0.093	-0.74	0.422	0.503	-0.531	-0.409	-.887*	0.563	0.644	0.736	-0.535	0.721	0.666	0.257	-.878*	-0.772	-0.772	-0.787	-0.52	-.863*	-0.331	-0.399	-0.207
114292499	0.579	-0.145	-.838*	0.54	0.711	-0.663	-0.54	-.925**	0.714	.831*	0.519	-0.711	.831*	.840*	-0.008	-0.805	-0.739	-0.739	-0.737	-0.609	-0.773	-0.345	-0.259	-0.293
114283565	0.162	0.075	-0.544	0.171	0.344	-0.422	-0.055	-0.647	0.282	0.549	0.586	-0.329	0.445	0.523	0.213	-0.733	-0.761	-0.761	-0.783	-0.519	-0.603	-0.516	-0.069	-0.166
114282010	0.215	0.041	-0.6	0.195	0.386	-0.475	-0.119	-0.696	0.328	0.586	0.594	-0.39	0.492	0.565	0.183	-0.765	-0.776	-0.776	-0.784	-0.565	-0.654	-0.492	-0.061	-0.246

## Sheet: (D) DEGs of Plant hormone
Supplementary data 4 Correlation coefficients between RSA indexes and other indexes. (A) RSA indexes and contents of sugar and P; (B) RSA indexes and DEGs of Phosphorus metabolism; (C) RSA indexes and DEGs of Sugar metabolism; (D) RSA indexes and DEGs of Plant hormone; (E) RSA indexes and DEGs of Lipid metabolism. AR: adventitious root number; LR: lateral root number; TLR: total lateral root numb…
Gene ID	AR	1st LR	2nd LR	3rd LR	4th LR	TLR	1st LR / AR	2nd LR / 1st LR	3rd LR / 2nd LR	4th LR / 3rd LR	1st LR / TRL	2nd LR / TRL	3rd LR / TRL	4th LR / TRL	TLR / TRL	TRL	TPA	TSA	TV	AD	D1L	D2L	D3L	D4L
114321959	0.61	-0.124	-0.738	0.746	0.779	-0.527	-0.556	-.848*	0.804	.868*	0.371	-0.708	.884*	.873*	-0.07	-0.587	-0.494	-0.494	-0.5	-0.416	-0.634	-0.111	-0.28	-0.284371
114323561	0.471	-0.108	-0.686	0.65	0.718	-0.499	-0.425	-0.789	0.703	.839*	0.365	-0.633	0.796	.828*	-0.05	-0.58	-0.534	-0.534	-0.548	-0.432	-0.577	-0.21	-0.191	-0.249809
114303032	0.364	0.118	-0.633	0.281	0.399	-0.462	-0.205	-0.768	0.402	0.581	0.698	-0.405	0.571	0.578	0.277	-.827*	-0.791	-0.791	-.817*	-0.511	-0.744	-0.45	-0.259	-0.147212
114311763	0.421	-0.082	-0.658	0.599	0.674	-0.478	-0.367	-0.765	0.653	0.806	0.391	-0.575	0.751	0.79	-0.004	-0.602	-0.586	-0.586	-0.621	-0.419	-0.55	-0.309	-0.229	-0.115426
114294830	.862*	0.06	-0.783	0.671	0.63	-0.523	-0.674	-.944**	0.779	0.685	0.664	-0.667	.892*	0.74	0.184	-0.78	-0.571	-0.571	-0.575	-0.399	-.898*	-0.033	-0.583	-0.258088
114279086	0.436	0.065	-0.703	0.316	0.458	-0.53	-0.296	-.826*	0.465	0.629	0.69	-0.496	0.632	0.634	0.218	-.848*	-0.78	-0.78	-0.777	-0.575	-0.81	-0.374	-0.214	-0.317934
114261171	0.144	0.156	-0.494	0.079	0.235	-0.373	0.004	-0.611	0.195	0.443	0.666	-0.233	0.37	0.422	0.324	-0.772	-0.803	-0.803	-.844*	-0.481	-0.614	-0.579	-0.158	-0.0294744
114277121	.889*	-0.234	-.853*	0.811	.848*	-0.641	-.870*	-.932**	.953**	.840*	0.348	-.857*	.993**	.890*	-0.154	-0.62	-0.44	-0.44	-0.42	-0.439	-0.743	0.03	-0.457	-0.329005
114266460	0.502	-0.434	-.887*	0.553	.859*	-0.788	-0.644	-.881*	0.792	.938**	0.236	-.826*	.847*	.933**	-0.3	-0.704	-0.726	-0.726	-0.725	-0.684	-0.584	-0.48	-0.143	-0.191508
114277140	0.119	0.08	-0.545	-0.004	0.236	-0.457	-0.018	-0.627	0.167	0.449	0.646	-0.29	0.348	0.429	0.248	-0.799	-.823*	-.823*	-.818*	-0.604	-0.662	-0.558	0.006	-0.271772
114308158	0.471	0.134	-0.678	0.324	0.419	-0.486	-0.288	-.823*	0.453	0.586	0.744	-0.461	0.626	0.598	0.288	-.854*	-0.762	-0.762	-0.765	-0.527	-.838*	-0.332	-0.281	-0.292674
114316026	.844*	0.211	-0.689	0.497	0.418	-0.431	-0.577	-.869*	0.606	0.476	0.792	-0.531	0.745	0.546	0.343	-0.797	-0.535	-0.535	-0.513	-0.364	-.972**	0.069	-0.572	-0.381209
114278857	0.038	-0.06	-0.532	0.132	0.386	-0.461	-0.027	-0.584	0.261	0.592	0.425	-0.356	0.403	0.548	0.057	-0.648	-0.73	-0.73	-0.737	-0.57	-0.482	-0.562	0.111	-0.223147
114323882	-0.603	0.027	0.703	-0.709	-0.706	0.476	0.493	.839*	-0.748	-0.811	-0.457	0.645	-.848*	-.818*	-0.031	0.613	0.503	0.503	0.512	0.389	0.675	0.092	0.307	0.291818
114312929	-0.281	0.512	.837*	-0.034	-0.57	.874*	0.512	0.738	-0.453	-0.648	-0.271	0.663	-0.519	-0.649	0.269	.830*	.935**	.935**	.918**	.865*	0.561	.819*	0.02	0.0906694
114282102	-0.516	-0.083	0.473	-0.735	-0.59	0.238	0.364	0.638	-0.665	-0.663	-0.367	0.425	-0.728	-0.663	-0.13	0.428	0.371	0.371	0.468	0.088	0.419	0.145	0.545	-0.255869
114271842	-0.284	0.274	0.651	-0.22	-0.519	0.604	0.378	0.648	-0.461	-0.602	-0.312	0.484	-0.524	-0.595	0.071	0.696	0.799	0.799	.866*	0.541	0.431	0.746	0.294	-0.313335
114319131	-0.477	-0.288	0.271	-0.763	-0.444	-0.005	0.215	0.493	-0.564	-0.515	-0.382	0.25	-0.629	-0.515	-0.273	0.26	0.156	0.156	0.261	-0.143	0.339	-0.086	0.58	-0.257198
114310347	-0.441	-0.167	0.612	-0.413	-0.44	0.402	0.242	0.776	-0.473	-0.61	-0.686	0.429	-0.636	-0.612	-0.283	0.754	0.668	0.668	0.687	0.427	0.753	0.266	0.285	0.240684
114283883	0.719	-0.003	-.833*	0.505	0.602	-0.621	-0.583	-.959**	0.684	0.705	0.691	-0.667	.822*	0.743	0.156	-.883*	-0.735	-0.735	-0.723	-0.568	-.922**	-0.23	-0.411	-0.337905
114302303	.873*	0.092	-0.742	0.658	0.585	-0.48	-0.667	-.906*	0.748	0.63	0.654	-0.652	.860*	0.691	0.187	-0.721	-0.47	-0.47	-0.444	-0.371	-.910*	0.121	-0.516	-0.43221
114274046	0.292	-0.192	-0.762	0.274	0.582	-0.668	-0.32	-0.799	0.492	0.75	0.467	-0.591	0.624	0.731	-0.035	-0.803	-.837*	-.837*	-.830*	-0.708	-0.659	-0.569	-0.02	-0.286004
114257101	0.051	-0.234	-0.533	0.32	0.562	-0.475	-0.137	-0.545	0.407	0.727	0.152	-0.49	0.494	0.675	-0.202	-0.43	-0.506	-0.506	-0.481	-0.531	-0.337	-0.352	0.273	-0.413422
114282748	0.746	-0.162	-.824*	0.763	.815*	-0.608	-0.698	-.928**	.877*	.871*	0.42	-0.775	.950**	.897*	-0.067	-0.678	-0.561	-0.561	-0.573	-0.455	-0.718	-0.15	-0.425	-0.204534
114306566	-0.034	0.176	-0.352	-0.017	0.13	-0.265	0.168	-0.45	0.046	0.355	0.552	-0.142	0.22	0.318	0.273	-0.594	-0.623	-0.623	-0.616	-0.444	-0.502	-0.403	0.13	-0.322789
114260196	-0.236	-0.422	-0.405	0.14	0.509	-0.457	-0.006	-0.325	0.259	0.659	-0.131	-0.391	0.294	0.578	-0.391	-0.258	-0.473	-0.473	-0.469	-0.522	-0.021	-0.571	0.452	-0.175993
114275063	.867*	0.072	-0.79	0.549	0.547	-0.55	-0.674	-.938**	0.706	0.598	0.722	-0.647	.829*	0.664	0.219	-.835*	-0.605	-0.605	-0.586	-0.456	-.965**	-0.031	-0.553	-0.35347
114309651	-0.494	-0.316	0.276	-0.779	-0.442	-0.011	0.212	0.508	-0.567	-0.521	-0.407	0.262	-0.642	-0.523	-0.285	0.258	0.127	0.127	0.213	-0.134	0.381	-0.167	0.534	-0.122429
114292569	-0.45	0.102	0.706	-0.383	-0.559	0.568	0.413	0.785	-0.562	-0.669	-0.509	0.523	-0.665	-0.673	-0.086	0.787	0.803	0.803	.867*	0.504	0.62	0.586	0.415	-0.178665
114305402	-0.454	0.325	.840*	-0.366	-0.689	0.753	0.544	.848*	-0.641	-0.783	-0.387	0.688	-0.723	-0.785	0.128	.817*	.858*	.858*	.884*	0.684	0.628	0.647	0.256	-0.0081008
114317769	-0.421	0.373	.892*	-0.274	-0.674	.832*	0.539	.868*	-0.588	-0.791	-0.379	0.775	-0.694	-0.795	0.221	0.811	0.789	0.789	0.711	.854*	0.749	0.425	-0.105	0.63064
114263235	-0.283	0.443	.874*	-0.04	-0.567	.885*	0.466	0.798	-0.439	-0.69	-0.361	0.706	-0.545	-0.688	0.24	.862*	.906*	.906*	.829*	.949**	0.7	0.639	-0.179	0.532121
114288628	-0.359	0.304	0.776	-0.129	-0.515	0.74	0.458	0.757	-0.462	-0.606	-0.427	0.567	-0.551	-0.614	0.061	.857*	.924**	.924**	.951**	0.711	0.612	0.77	0.247	-0.0970847
114314594	-0.447	0.322	0.782	-0.427	-0.69	0.689	0.533	0.781	-0.63	-0.782	-0.263	0.758	-0.711	-0.786	0.262	0.595	0.517	0.517	0.42	0.686	0.656	0.113	-0.157	0.786371
114323824	-0.516	0.227	0.784	-0.644	-0.794	0.619	0.533	.853*	-0.767	-.898*	-0.336	0.726	-.847*	-.892*	0.136	0.647	0.619	0.619	0.63	0.529	0.604	0.31	0.205	0.220371
114315763	-0.434	0.42	.855*	-0.397	-0.746	0.788	0.577	.824*	-0.657	-.839*	-0.24	.816*	-0.735	-.839*	0.328	0.66	0.62	0.62	0.528	0.779	0.66	0.254	-0.17	0.729512
114311646	-0.477	0.459	.858*	-0.413	-0.759	0.798	0.64	.813*	-0.683	-.826*	-0.191	.848*	-0.743	-.834*	0.379	0.619	0.559	0.559	0.451	0.771	0.652	0.176	-0.179	0.789601
114293269	0.423	-0.069	-0.698	0.479	0.608	-0.533	-0.36	-0.792	0.581	0.755	0.465	-0.601	0.707	0.749	0.006	-0.663	-0.595	-0.595	-0.566	-0.542	-0.684	-0.203	-0.055	-0.490974
114321176	.850*	0.058	-0.788	0.569	0.567	-0.549	-0.667	-.933**	0.714	0.623	0.691	-0.664	.837*	0.685	0.185	-0.803	-0.57	-0.57	-0.539	-0.462	-.953**	0.015	-0.487	-0.441213

## Sheet: (E) DEGs of Lipid metabolism
Supplementary data 4 Correlation coefficients between RSA indexes and other indexes. (A) RSA indexes and contents of sugar and P; (B) RSA indexes and DEGs of Phosphorus metabolism; (C) RSA indexes and DEGs of Sugar metabolism; (D) RSA indexes and DEGs of Plant hormone; (E) RSA indexes and DEGs of Lipid metabolism. AR: adventitious root number; LR: lateral root number; TLR: total lateral root numb…
Gene ID	AR	1st LR	2nd LR	3rd LR	4th LR	TLR	1st LR / AR	2nd LR / 1st LR	3rd LR / 2nd LR	4th LR / 3rd LR	1st LR / TRL	2nd LR / TRL	3rd LR / TRL	4th LR / TRL	TLR / TRL	TRL	TPA	TSA	TV	AD	D1L	D2L	D3L	D4L
114301914	-0.612	-0.006	0.665	-0.744	-0.698	0.426	0.483	.816*	-0.755	-0.794	-0.454	0.606	-.848*	-0.801	-0.066	0.588	0.486	0.486	0.521	0.314	0.632	0.111	0.403	0.134
114258495	-0.613	-0.191	0.449	-.835*	-0.582	0.163	0.383	0.656	-0.701	-0.651	-0.419	0.437	-0.776	-0.663	-0.186	0.375	0.229	0.229	0.292	0.019	0.5	-0.128	0.528	-0.001
114270756	-0.541	0.063	0.693	-0.609	-0.665	0.498	0.465	0.81	-0.695	-0.765	-0.461	0.579	-0.786	-0.768	-0.06	0.679	0.646	0.646	0.709	0.391	0.603	0.37	0.446	-0.094
114292334	-0.402	0.388	.891*	-0.303	-0.702	.830*	0.53	.867*	-0.606	-.824*	-0.352	0.78	-0.708	-.822*	0.241	0.796	0.791	0.791	0.722	.845*	0.717	0.451	-0.106	0.586
114278124	-0.519	0.127	0.713	-0.531	-0.651	0.55	0.486	0.8	-0.669	-0.74	-0.438	0.582	-0.751	-0.745	-0.026	0.711	0.706	0.706	0.773	0.441	0.586	0.476	0.449	-0.171
114262759	-0.373	0.392	0.773	-0.381	-0.696	0.712	0.51	0.742	-0.602	-0.789	-0.186	0.761	-0.673	-0.784	0.335	0.561	0.517	0.517	0.413	0.719	0.594	0.16	-0.248	0.799
114276132	-0.636	0.079	0.804	-0.558	-0.666	0.609	0.552	.907*	-0.701	-0.774	-0.542	0.706	-.823*	-0.796	-0.021	0.751	0.614	0.614	0.575	0.569	.827*	0.122	0.21	0.531
114262817	-0.637	0.115	0.811	-0.647	-0.743	0.608	0.573	.917*	-0.771	-.846*	-0.489	0.723	-.876*	-.859*	0.013	0.73	0.632	0.632	0.629	0.525	0.754	0.209	0.297	0.321
114261422	-0.469	0.181	.825*	-0.431	-0.672	0.686	0.466	.888*	-0.636	-0.81	-0.501	0.673	-0.757	-0.808	0.024	.826*	0.81	0.81	.813*	0.663	0.729	0.48	0.186	0.243
114260727	-0.504	-0.159	0.448	-0.714	-0.541	0.198	0.308	0.635	-0.624	-0.631	-0.432	0.382	-0.705	-0.631	-0.203	0.445	0.374	0.374	0.468	0.072	0.454	0.119	0.542	-0.217
114267287	-0.428	0.046	0.6	-0.63	-0.647	0.41	0.353	0.713	-0.636	-0.771	-0.343	0.576	-0.731	-0.758	0.033	0.482	0.404	0.404	0.39	0.373	0.551	0.042	0.085	0.43
114265447	-0.465	0.094	0.726	-0.554	-0.673	0.549	0.412	.827*	-0.658	-0.808	-0.461	0.611	-0.769	-0.8	-0.016	0.702	0.677	0.677	0.704	0.499	0.639	0.366	0.251	0.146
114323608	-0.401	0.261	0.733	-0.376	-0.632	0.639	0.464	0.758	-0.594	-0.722	-0.355	0.587	-0.665	-0.718	0.077	0.731	0.79	0.79	.848*	0.555	0.524	0.647	0.325	-0.192
114275195	-0.449	0.318	.893*	-0.328	-0.687	0.806	0.53	.897*	-0.616	-.814*	-0.432	0.76	-0.73	-.816*	0.161	.839*	.817*	.817*	0.762	.815*	0.765	0.452	-0.012	0.524
114291623	-0.485	0.217	0.809	-0.466	-0.696	0.675	0.504	.865*	-0.669	-0.809	-0.444	0.666	-0.767	-0.808	0.05	0.794	0.802	0.802	.834*	0.607	0.656	0.539	0.291	0.034
114299141	-0.218	0.297	0.651	0.015	-0.387	0.659	0.339	0.61	-0.315	-0.471	-0.359	0.434	-0.39	-0.472	0.05	0.775	.889*	.889*	.931**	0.65	0.476	.843*	0.213	-0.244
114317610	-0.192	0.25	0.676	0.048	-0.369	0.675	0.285	0.65	-0.285	-0.489	-0.443	0.43	-0.39	-0.484	-0.003	.842*	.950**	.950**	.981**	0.708	0.549	.859*	0.153	-0.131
114306465	-0.355	0.087	0.758	-0.202	-0.48	0.647	0.315	.819*	-0.432	-0.651	-0.602	0.556	-0.59	-0.65	-0.08	.866*	.837*	.837*	0.803	0.72	0.789	0.466	0.037	0.446
114318895	-0.543	-0.017	0.627	-0.671	-0.644	0.405	0.419	0.773	-0.691	-0.747	-0.462	0.534	-0.784	-0.748	-0.106	0.607	0.551	0.551	0.617	0.296	0.577	0.256	0.458	-0.073
114265554	-0.624	-0.015	0.638	-0.671	-0.631	0.413	0.496	0.783	-0.714	-0.702	-0.481	0.536	-0.795	-0.718	-0.128	0.63	0.559	0.559	0.639	0.268	0.595	0.269	0.591	-0.196
114276617	-0.49	0.192	0.738	-0.651	-0.77	0.568	0.491	.818*	-0.747	-.876*	-0.33	0.68	-.825*	-.866*	0.108	0.615	0.596	0.596	0.622	0.474	0.562	0.315	0.235	0.139
114278694	-0.334	0.24	0.739	-0.164	-0.505	0.682	0.397	0.746	-0.453	-0.614	-0.453	0.527	-0.551	-0.614	0.009	.840*	.911*	.911*	.952**	0.66	0.595	0.761	0.266	-0.139
114256595	-0.545	0.163	0.683	-0.734	-0.773	0.493	0.526	0.778	-0.786	-.847*	-0.29	0.649	-.841*	-.843*	0.091	0.539	0.509	0.509	0.562	0.347	0.497	0.258	0.373	-0.034
114265335	-0.627	0.443	.990**	-0.406	-0.785	.908*	0.762	.963**	-0.755	-.845*	-0.371	.889*	-.832*	-.872*	0.265	.854*	0.798	0.798	0.737	.838*	0.8	0.412	0.115	0.482
114265876	-0.488	0.022	0.57	-0.681	-0.647	0.365	0.397	0.701	-0.681	-0.735	-0.36	0.503	-0.75	-0.729	-0.053	0.516	0.491	0.491	0.573	0.235	0.46	0.272	0.455	-0.188
114264035	-0.576	0.089	0.774	-0.616	-0.71	0.575	0.504	.885*	-0.725	-.829*	-0.491	0.678	-.837*	-.834*	-0.01	0.717	0.636	0.636	0.638	0.512	0.725	0.236	0.267	0.299
114274416	0.779	-0.168	-.856*	0.684	0.774	-0.652	-0.733	-.950**	.852*	.820*	0.48	-0.766	.928**	.856*	-0.027	-0.763	-0.65	-0.65	-0.671	-0.496	-0.767	-0.247	-0.507	-0.107
114261529	.886*	-0.079	-.844*	0.714	0.73	-0.608	-0.776	-.966**	.860*	0.76	0.553	-0.765	.945**	.815*	0.042	-0.755	-0.562	-0.562	-0.557	-0.452	-.860*	-0.05	-0.543	-0.277
114267102	0.808	-0.122	-.822*	0.778	0.795	-0.59	-0.73	-.939**	.887*	.839*	0.46	-0.772	.962**	.875*	-0.026	-0.686	-0.536	-0.536	-0.545	-0.427	-0.76	-0.087	-0.483	-0.22
114315237	0.479	-0.168	-0.732	0.634	0.748	-0.559	-0.466	-.815*	0.72	.866*	0.345	-0.684	0.81	.856*	-0.106	-0.6	-0.553	-0.553	-0.549	-0.498	-0.601	-0.214	-0.132	-0.342
114320930	0.233	0.014	-0.568	0.342	0.473	-0.426	-0.151	-0.674	0.421	0.653	0.494	-0.399	0.554	0.624	0.134	-0.672	-0.708	-0.708	-0.756	-0.453	-0.536	-0.497	-0.167	-0.024
114311355	0.4	0.284	-0.561	0.171	0.225	-0.371	-0.144	-0.731	0.283	0.405	.851*	-0.286	0.478	0.421	0.459	-.868*	-0.776	-0.776	-0.796	-0.452	-.833*	-0.369	-0.344	-0.173
114315850	0.405	-0.099	-0.619	0.654	0.698	-0.437	-0.363	-0.722	0.671	.821*	0.305	-0.584	0.754	0.8	-0.063	-0.499	-0.472	-0.472	-0.494	-0.372	-0.491	-0.193	-0.158	-0.207
114302782	0.67	-0.263	-.948**	0.362	0.665	-.827*	-0.696	-.975**	0.686	0.742	0.555	-0.786	0.795	0.78	-0.06	-.936**	-.846*	-.846*	-0.804	-0.776	-.895*	-0.411	-0.263	-0.393
114287005	0.519	-0.652	-.915*	0.602	.970**	-.866*	-0.79	-.837*	.876*	.991**	-0.011	-.956**	.876*	.990**	-0.562	-0.553	-0.57	-0.57	-0.524	-0.721	-0.48	-0.344	0.02	-0.385
114287486	0.631	0.106	-0.678	0.64	0.598	-0.429	-0.443	-.851*	0.679	0.715	0.619	-0.551	0.806	0.731	0.207	-0.713	-0.592	-0.592	-0.629	-0.353	-0.75	-0.17	-0.467	-0.128
114268372	.944**	0.131	-0.705	0.661	0.536	-0.434	-0.712	-.876*	0.745	0.546	0.667	-0.616	.844*	0.623	0.233	-0.698	-0.418	-0.418	-0.403	-0.292	-.907*	0.175	-0.643	-0.331
114312621	.920**	0.072	-0.732	0.771	0.65	-0.453	-0.721	-.903*	.831*	0.671	0.597	-0.662	.918**	0.732	0.165	-0.676	-0.442	-0.442	-0.456	-0.281	-.835*	0.089	-0.661	-0.195
114266040	0.656	0.092	-0.764	0.455	0.518	-0.544	-0.473	-.913*	0.6	0.644	0.743	-0.578	0.756	0.676	0.244	-.872*	-0.723	-0.723	-0.716	-0.525	-.915*	-0.219	-0.393	-0.338
114307499	.881*	0.219	-0.684	0.536	0.43	-0.416	-0.606	-.871*	0.635	0.475	0.789	-0.529	0.766	0.549	0.354	-0.789	-0.523	-0.523	-0.517	-0.323	-.959**	0.068	-0.651	-0.287
114282815	0.537	-0.047	-0.808	0.294	0.512	-0.658	-0.453	-.898*	0.535	0.645	0.691	-0.577	0.683	0.666	0.166	-.951**	-.896*	-.896*	-.907*	-0.653	-.853*	-0.519	-0.35	-0.15
114290450	.833*	-0.301	-.885*	0.424	0.641	-0.766	-.871*	-.890*	0.737	0.618	0.424	-.813*	0.792	0.691	-0.143	-0.76	-0.575	-0.575	-0.498	-0.643	-.853*	-0.085	-0.326	-0.511
114279799	.916*	0.091	-0.73	0.649	0.561	-0.47	-0.709	-.888*	0.747	0.581	0.644	-0.648	.848*	0.653	0.186	-0.701	-0.429	-0.429	-0.397	-0.346	-.913*	0.173	-0.554	-0.432
114264210	0.319	0.086	-0.587	0.381	0.462	-0.412	-0.182	-0.72	0.442	0.643	0.573	-0.426	0.593	0.627	0.186	-0.689	-0.655	-0.655	-0.671	-0.454	-0.648	-0.326	-0.149	-0.251
114262883	.856*	-0.038	-0.763	0.782	0.724	-0.512	-0.725	-.899*	.853*	0.754	0.482	-0.742	.931**	0.803	0.017	-0.615	-0.391	-0.391	-0.363	-0.366	-0.802	0.153	-0.436	-0.452
114278164	.847*	-0.155	-0.764	.837*	0.8	-0.536	-0.788	-.865*	.909*	0.802	0.328	-0.803	.954**	.848*	-0.128	-0.513	-0.303	-0.303	-0.264	-0.359	-0.709	0.204	-0.366	-0.486
114311614	0.278	-0.246	-0.647	0.539	0.715	-0.53	-0.338	-0.688	0.618	.848*	0.193	-0.625	0.693	.814*	-0.208	-0.485	-0.509	-0.509	-0.5	-0.504	-0.434	-0.28	0.065	-0.348
114288457	.843*	-0.081	-0.803	0.792	0.77	-0.558	-0.738	-.931**	.883*	0.808	0.475	-0.768	.960**	.851*	-0.006	-0.657	-0.467	-0.467	-0.457	-0.401	-0.791	0.038	-0.463	-0.345
114300910	.910*	-0.013	-0.779	0.784	0.714	-0.517	-0.76	-.926**	.870*	0.733	0.54	-0.726	.948**	0.79	0.078	-0.677	-0.459	-0.459	-0.461	-0.342	-.824*	0.063	-0.594	-0.251
114282346	0.73	-0.211	-0.783	.829*	.854*	-0.573	-0.713	-.871*	.905*	.893*	0.287	-0.808	.955**	.915*	-0.176	-0.533	-0.396	-0.396	-0.377	-0.414	-0.645	0.032	-0.292	-0.394
114297815	0.275	-0.491	-0.743	0.537	.846*	-0.686	-0.48	-0.707	0.704	.941**	0.013	-0.76	0.736	.905*	-0.437	-0.47	-0.545	-0.545	-0.526	-0.618	-0.358	-0.394	0.136	-0.317
114283523	0.628	-0.127	-.852*	0.536	0.699	-0.67	-0.574	-.946**	0.724	0.808	0.561	-0.709	.841*	.826*	0.028	-.843*	-0.767	-0.767	-0.773	-0.602	-0.806	-0.364	-0.342	-0.227
114295112	0.807	-0.293	-.878*	0.793	.889*	-0.686	-.830*	-.939**	.948**	.905*	0.309	-.881*	.992**	.940**	-0.212	-0.631	-0.494	-0.494	-0.473	-0.505	-0.711	-0.061	-0.357	-0.349
114292590	0.102	-0.308	-0.598	0.387	0.655	-0.539	-0.225	-0.6	0.501	0.804	0.127	-0.546	0.571	0.752	-0.243	-0.478	-0.591	-0.591	-0.603	-0.541	-0.314	-0.497	0.137	-0.171
114317640	0.753	0.114	-0.741	0.616	0.581	-0.484	-0.545	-.914*	0.7	0.677	0.695	-0.607	.835*	0.717	0.228	-0.781	-0.594	-0.594	-0.595	-0.411	-.886*	-0.064	-0.483	-0.315
114277164	0.071	0.148	-0.437	0.1	0.24	-0.323	0.062	-0.551	0.178	0.453	0.589	-0.203	0.343	0.42	0.287	-0.685	-0.738	-0.738	-0.784	-0.433	-0.522	-0.558	-0.097	-0.016
114284818	0.757	-0.204	-.934**	0.471	0.69	-0.774	-0.736	-.993**	0.749	0.752	0.577	-0.789	.854*	0.798	-0.017	-.908*	-0.782	-0.782	-0.753	-0.688	-.909*	-0.314	-0.372	-0.349
114283874	0.522	-0.033	-0.781	0.431	0.587	-0.603	-0.427	-.890*	0.598	0.732	0.627	-0.6	0.741	0.74	0.126	-.854*	-0.793	-0.793	-0.803	-0.589	-0.8	-0.404	-0.29	-0.23
114304122	.822*	0.031	-0.795	0.659	0.647	-0.546	-0.654	-.946**	0.773	0.716	0.641	-0.688	.889*	0.764	0.145	-0.774	-0.573	-0.573	-0.561	-0.442	-.896*	-0.028	-0.487	-0.361
114274613	.866*	0.167	-0.715	0.577	0.494	-0.451	-0.619	-.892*	0.675	0.547	0.742	-0.584	0.804	0.614	0.285	-0.771	-0.513	-0.513	-0.493	-0.362	-.951**	0.086	-0.567	-0.385
114304673	0.19	-0.087	-0.619	0.297	0.512	-0.509	-0.171	-0.686	0.419	0.698	0.43	-0.472	0.551	0.665	0.021	-0.668	-0.709	-0.709	-0.715	-0.567	-0.549	-0.476	0.021	-0.259
114322109	.905*	-0.024	-.822*	0.645	0.649	-0.586	-0.762	-.950**	0.8	0.676	0.611	-0.732	.897*	0.741	0.098	-0.769	-0.538	-0.538	-0.509	-0.455	-.919**	0.031	-0.522	-0.399
114303154	0.27	0.105	-0.603	0.181	0.345	-0.461	-0.132	-0.72	0.319	0.541	0.681	-0.363	0.493	0.53	0.268	-.821*	-0.811	-0.811	-.830*	-0.546	-0.712	-0.503	-0.166	-0.178
114300445	.932**	-0.278	-.832*	0.781	.818*	-0.64	-.939**	-.886*	.945**	0.768	0.285	-.865*	.961**	.833*	-0.204	-0.561	-0.354	-0.354	-0.315	-0.418	-0.721	0.123	-0.456	-0.379
114268197	0.785	-0.52	-.905*	0.722	.933**	-0.789	-.949**	-.876*	.958**	.893*	0.091	-.971**	.952**	.934**	-0.449	-0.533	-0.412	-0.412	-0.349	-0.587	-0.615	-0.029	-0.197	-0.482
114274576	0.483	-0.123	-0.809	0.426	0.637	-0.656	-0.444	-.889*	0.615	0.782	0.549	-0.651	0.748	0.784	0.026	-.831*	-0.791	-0.791	-0.784	-0.648	-0.767	-0.419	-0.184	-0.312
114280426	0.735	0.142	-0.755	0.407	0.445	-0.53	-0.518	-.911*	0.572	0.545	0.811	-0.55	0.729	0.598	0.313	-.904*	-0.713	-0.713	-0.7	-0.502	-.978**	-0.167	-0.487	-0.332
